# Supplementary material
Source: PubMed Central journal article supplement (PMC3255718)

## Supplement

**Fig. 1 Computer-assisted analysis of sperm motility.** The parameters of wild-type (+/+), heterozygous (+/-) and homozygous (-/-) Odf1-deficient spermatozoa are shown. Sperm velocities ( $\mu\text{m}/\text{sec}$ ), straightness of the movement (percent), lateral amplitude of the sperm head ( $\mu\text{m}$ ), and beat frequency (Hz) were measured. For all measurements the median, and the percentiles (25%-75% and 5%-95%) are shown. Homozygous Odf1-deficient spermatozoa exhibit significantly reduced velocities and ALH and an increased BCF and STR compared to wild-type. Velocities and amplitude of the lateral head displacement of heterozygous spermatozoa demonstrated the middle values between wild-type and homozygous spermatozoa.

# Supplement Fig. 1

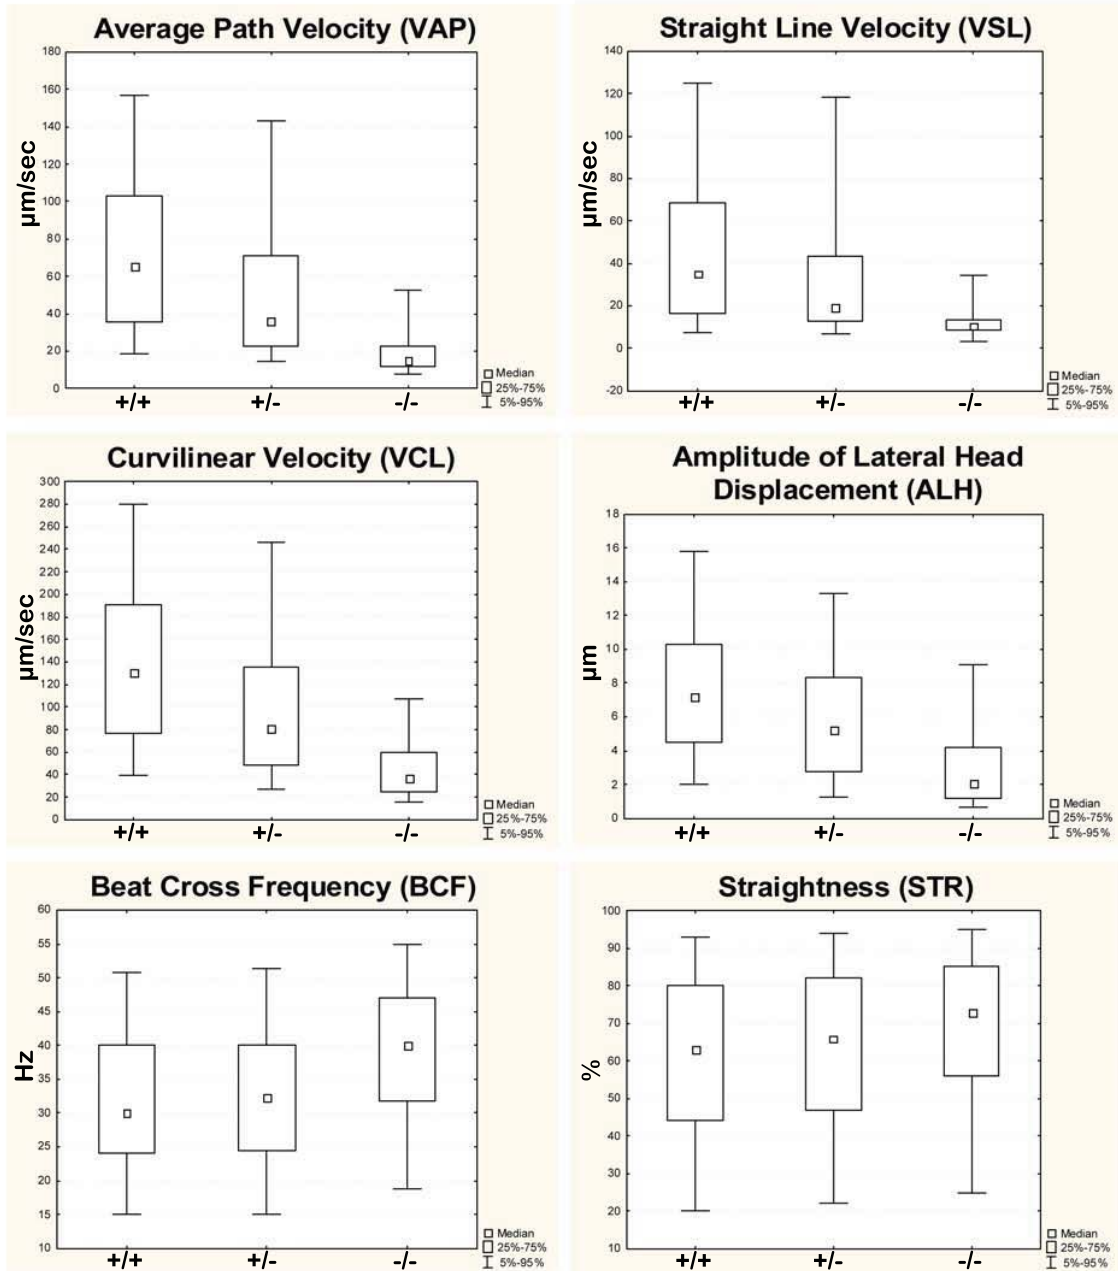

Supplement: supp_32.1.216_MCB6158-11_SF1.pdf [file supp_32.1.216_MCB6158-11_SF1.pdf]
